# Supplementary material
Source: publisher site journal article supplement (https://www.dovepress.com/article/405121)
Supplement: Supplementary file 1 [file get_supplementary_file.php]

**Appendix**

| Appendix 1. Predictors of ED in elderly men (n= 2,436). | | | | |
| --- | --- | --- | --- | --- |
| **Variables** | **OR** | **CI (95%)** | | **p** | |
| Hypertension | 1.19 | 1.08 | 1.31 | 0.002 |
| Diabetes mellitus | 1.66 | 1.29 | 2.13 | <0.001 |
| Metabolic Syndrome | 1.01 | 0.75 | 1.35 | 0.96 |
| Physical Activity Level |  |  |  |  |
| *Low active* | 0.84 | 0.63 | 1.11 | 0.21 |
| *Moderate* | 0.95 | 0.73 | 1.25 | 0.73 |
| *Very Active* | 1.02 | 0.70 | 1.48 | 0.94 |
| Non-alcoholic fatty liver disease | 1.05 | 0.85 | 1.31 | 0.64 |
| Lower urinary tract symptoms |  |  |  |  |
| *Moderate* | 2.28 | 1.78 | 2.92 | <0.001 |
| *Severe* | 2.85 | 1.62 | 5.00 | <0.001 |
| Perceived Stress | 0.98 | 0.73 | 1.31 | 0.89 |
| Depressive symptoms | 2.16 | 1.58 | 2.95 | <0.001 |
| Age | 1.09 | 1.06 | 1.11 | <0.001 |
| IMC | 1.01 | 0.99 | 1.04 | 0.34 |
| HDL | 0.99 | 0.98 | 1.00 | 0.16 |
| LDL | 1.00 | 1.00 | 1.00 | 0.16 |
| Total PSA | 0.98 | 0.95 | 1.02 | 0.32 |
| Creatinine | 1.10 | 0.72 | 1.68 | 0.65 |
| *Full multiple logistic regression* | | | | |
